# Supplementary material
Source: PubMed Central journal article supplement (PMC2859532)
Supplement: supp_M109.085340_Supplemental_Figure_1.pdf [file supp_M109.085340_Supplemental_Figure_1.pdf]

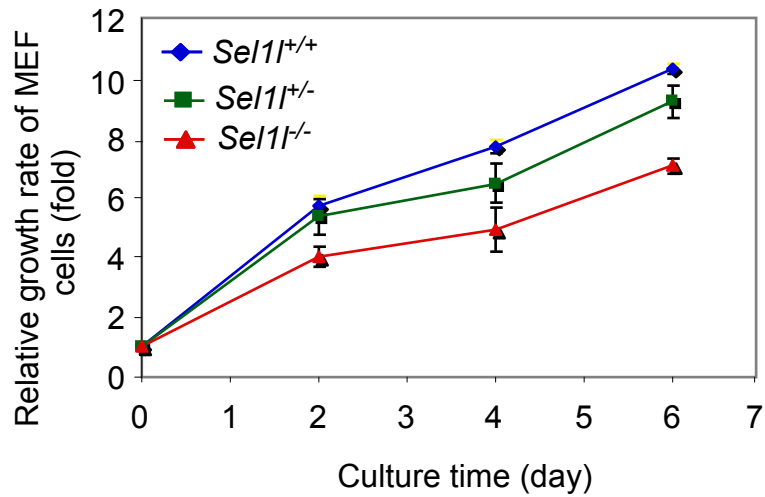

**Supplementary Figure 1 SEL1L-deficient MEFs exhibit reduced cell proliferation.** Primary MEF cells from *Sel1l*<sup>+/+</sup>, *Sel1l*<sup>+/-</sup> and *Sel1l*<sup>-/-</sup> embryos were plated in triplicates in 6-well plates ( $2 \times 10^4$  cells/well) and grown for 6 days. Cell counting was done every other day and relative growth rates were calculated by dividing the obtained cell numbers with the starting number of cells. The experiment was repeated three times using MEFs from embryos of independent litters.

Francisco et. al. Suppl. Fig.1
